# Supplementary material for: Central and peripheral pulse wave velocity and subclinical myocardial stress and damage in older adults
Source: PLOS journal article supplement (doi:10.1371/journal.pone.0212892), 2019-02-27
Supplement: S10 (10.1371/journal.pone.0212892.s010) [file journal.pone.0212892.s010]

**S7 Table:** Associations of femoral-ankle pulse wave velocity (faPWV) with NT-proBNP after excluding participants with ankle-brachial index  $\leq 0.9$

|                             |           | <b>Model 1</b>                             |          | <b>Model 2</b>                             |          | <b>Model 3</b>                             |          |
|-----------------------------|-----------|--------------------------------------------|----------|--------------------------------------------|----------|--------------------------------------------|----------|
|                             |           | <b>Δ NT-proBNP (95% CI),<br/>log-pg/ml</b> | <b>P</b> | <b>Δ NT-proBNP (95% CI),<br/>log-pg/ml</b> | <b>P</b> | <b>Δ NT-proBNP (95% CI),<br/>log-pg/ml</b> | <b>P</b> |
| <b>Categorical exposure</b> |           |                                            |          |                                            |          |                                            |          |
| <b>faPWV</b><br>(n=2956)    | <b>Q1</b> | 0.07 (-0.02, 0.17)                         | 0.11     | 0.11 (0.03, 0.20)                          | 0.01     | 0.08 (-0.0001, 0.17)                       | 0.05     |
|                             | <b>Q2</b> | <i>ref</i>                                 |          | <i>ref</i>                                 |          | <i>ref</i>                                 |          |
|                             | <b>Q3</b> | -0.0001 (-0.09, 0.09)                      | <0.001   | -0.04 (-0.12, 0.05)                        | 0.41     | -0.02 (-0.10, 0.06)                        | 0.63     |
|                             | <b>Q4</b> | -0.07 (-0.16, 0.03)                        | 0.16     | -0.14 (-0.23, -0.05)                       | 0.002    | -0.10 (-0.19, -0.02)                       | 0.02     |

Model 1 includes the main exposure, age, sex, race, education, study center

Model 2 includes Model 1, body mass index, systolic blood pressure, antihypertensive medication use, smoking, drinking status, diabetes, physical activity index, total cholesterol, reduced kidney function, kidney damage

Model 3 includes Model 2, left ventricular hypertrophy, concentric remodeling, diastolic dysfunction
